# Supplementary material for: Test-retest reliability, internal consistency, construct validity and factor structure of a falls risk perception questionnaire in older adults with type 2 diabetes mellitus: a prospective cohort study
Source: PubMed Central journal article supplement (PMC6886215; doi:10.1186/s40945-019-0065-4), 2019-12-02
Supplement: 40945_2019_65_MOESM1_ESM.pdf [file 40945_2019_65_MOESM1_ESM.pdf]

Please rate if you feel the following factor may increase your risk for falling.

4. Difficulty moving around the house or community

|                   |   |   |   |                |   |   |
|-------------------|---|---|---|----------------|---|---|
| 1                 | 2 | 3 | 4 | 5              | 6 | 7 |
| strongly disagree |   |   |   | strongly agree |   |   |

Please rate if you feel the following factor may increase your risk for falling.

5. Using a cane or walker

|                   |   |   |   |                |   |   |
|-------------------|---|---|---|----------------|---|---|
| 1                 | 2 | 3 | 4 | 5              | 6 | 7 |
| strongly disagree |   |   |   | strongly agree |   |   |

Please rate if you feel the following factor may increase your risk for falling.

6. Being physically active (beyond your regular daily activity)

|                   |   |   |   |                |   |   |
|-------------------|---|---|---|----------------|---|---|
| 1                 | 2 | 3 | 4 | 5              | 6 | 7 |
| strongly disagree |   |   |   | strongly agree |   |   |

**Internal/external factors**

I believe that my risk of falling is influenced by:

7. Information given to me by my friends and family

|                   |   |   |   |                |   |   |
|-------------------|---|---|---|----------------|---|---|
| 1                 | 2 | 3 | 4 | 5              | 6 | 7 |
| strongly disagree |   |   |   | strongly agree |   |   |

I believe that my risk of falling is influenced by:

8. Information given to me by the media (i.e. TV, radio, newspaper, etc.)

|                   |   |   |   |                |   |   |
|-------------------|---|---|---|----------------|---|---|
| 1                 | 2 | 3 | 4 | 5              | 6 | 7 |
| strongly disagree |   |   |   | strongly agree |   |   |

I believe that my risk of falling is influenced by:

9. Information given to me by my doctor, physiotherapist or health care worker

|                   |   |   |   |                |   |   |
|-------------------|---|---|---|----------------|---|---|
| 1                 | 2 | 3 | 4 | 5              | 6 | 7 |
| strongly disagree |   |   |   | strongly agree |   |   |

I believe that my risk of falling is influenced by:

10. My cultural and religious beliefs

|                   |   |   |   |                |   |   |
|-------------------|---|---|---|----------------|---|---|
| 1                 | 2 | 3 | 4 | 5              | 6 | 7 |
| strongly disagree |   |   |   | strongly agree |   |   |

11. I feel that getting older increases my risk of falling

|                   |   |   |   |                |   |   |
|-------------------|---|---|---|----------------|---|---|
| 1                 | 2 | 3 | 4 | 5              | 6 | 7 |
| strongly disagree |   |   |   | strongly agree |   |   |

**Individual perceptions**

12. a. I feel that people my age are more likely to fall than people who are younger

|                   |   |   |   |                |   |   |
|-------------------|---|---|---|----------------|---|---|
| 1                 | 2 | 3 | 4 | 5              | 6 | 7 |
| strongly disagree |   |   |   | strongly agree |   |   |

b. I am less likely to fall when compared to other people my age

|                   |   |   |   |                |   |   |
|-------------------|---|---|---|----------------|---|---|
| 1                 | 2 | 3 | 4 | 5              | 6 | 7 |
| strongly disagree |   |   |   | strongly agree |   |   |
