# Supplementary material for: Test-retest reliability, internal consistency, construct validity and factor structure of a falls risk perception questionnaire in older adults with type 2 diabetes mellitus: a prospective cohort study
Source: PubMed Central journal article supplement (PMC6886215; doi:10.1186/s40945-019-0065-4), 2019-12-02
Supplement: 40945_2019_65_MOESM2_ESM.pdf [file 40945_2019_65_MOESM2_ESM.pdf]

## Sample size calculation

Parameters:

- Type I error = 0.05
- Type II error = 0.20
- $k = 2$
- hypothesized ICC = 0.80

$$n = \frac{0.5 k (Z\alpha + Z\beta)^2}{\sigma^2 (k-1)} + 2$$

$$Z\alpha = 1.645$$

$$Z\beta = 0.842$$

$$R_{\text{expected}} = 0.80$$

$$Z_{\text{Expected}} = 0.5 \text{ natural log } \frac{1+(k-1)R_{\text{expected}}}{1-R_{\text{expected}}}$$

$$Z_{\text{Expected}} = 1.0986$$

$$R_{\text{lowerlimit}} = 0.80 - 0.10 = 0.70$$

$$Z_{\text{Rnull}} = 0.5 \text{ natural log } \frac{1+(2-1)0.70}{1-0.70}$$

$$Z_{\text{Rnull}} = 0.867$$

$$\sigma^2 = Z_{\text{Expected}} - Z_{\text{Rnull}}$$

$$\sigma^2 = 0.2316$$

$$n = \frac{0.5 k (Z\alpha + Z\beta)^2}{\sigma^2 (k-1)} + 2$$

$$n = 28.706$$

Sample size = 29 participants round to 30 participants

Sample size adjusted for attrition rate of 25% =  $30 \div (1-0.25) = 40$

Final sample size = 40 participants
